# Supplementary material
Source: PubMed Central journal article supplement (PMC4649647)
Supplement: 10.1534_115.178608_genetics.115.178608-2.pdf [file 10.1534_115.178608_genetics.115.178608-2.pdf]

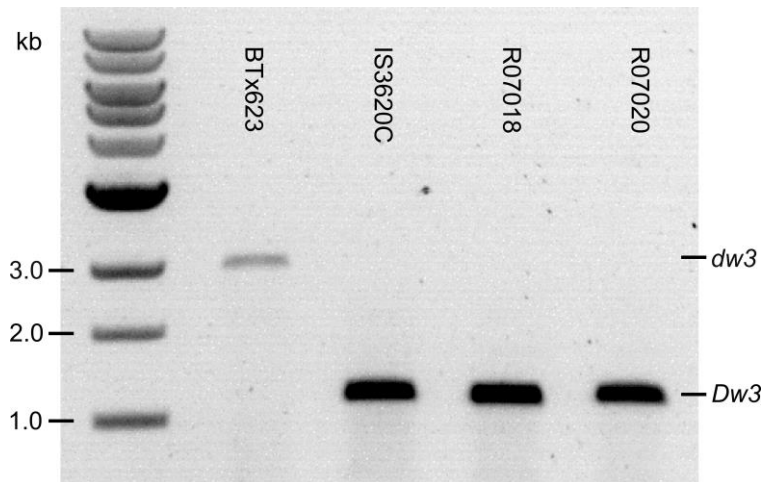

**Figure S3** *dwarf-3* genotypes of the bi-parental mapping populations. BTx623, IS3620C, R07018, and R07020 were genotyped at the *dw3* locus generated using primers designed by FARFAN *et al.* (2012) that flank the 882 bp tandem repeat that makes *dw3* non-functional. BTx623 has non-functional *dw3* alleles, while IS3620C, R07018, and R07020 have functional *Dw3* alleles.
