# Supplementary material
Source: PubMed Central journal article supplement (PMC4649647)
Supplement: 10.1534_115.178608_genetics.115.178608-3.pdf [file 10.1534_115.178608_genetics.115.178608-3.pdf]

**Table S1** Light distribution in canopies of RIL 63 and RIL 73.

| Time of acquisition            | Height         |                | Scaled depth   |                |
|--------------------------------|----------------|----------------|----------------|----------------|
|                                | RIL 73 (large) | RIL 63 (small) | RIL 73 (large) | RIL 63 (small) |
| July 22 <sup>nd</sup> at 1400* | 0.641993       | 0.426493       | 0.065483       | 0.054250       |
| July 22 <sup>nd</sup> at 1530* | 1.245529       | 0.392925       | 0.127043       | 0.050097       |
| July 23 <sup>rd</sup> at 1440  | 0.576724       | 0.295480       | 0.060556       | 0.038412       |
| July 24 <sup>th</sup> at 1240  | 0.325723       | 0.332027       | 0.034201       | 0.043828       |
| July 24 <sup>th</sup> at 1350  | 0.389599       | 0.297924       | 0.040908       | 0.040220       |
| July 25 <sup>th</sup> at 1220* | 0.374110       | 0.131663       | 0.038159       | 0.017116       |
| July 25 <sup>th</sup> at 1400* | 0.395254       | 0.210151       | 0.040316       | 0.031041       |

$k$  is calculated with and without scaling depth (height) and scaled depth; the qualitative relationship of  $k$ s between RIL 63 (small angles) and RIL 73 (large angles) remain the same. Data was retrieved in July 2014 on the given dates in College Station, TX. “\*” denote datasets where RIL 63 was measured by LP-80 #2 and RIL 73 data was measured by LP-80 #1. The LP-80s were switched at other times.
