# Supplementary material
Source: PubMed Central journal article supplement (PMC4649647)
Supplement: 10.1534_115.178608_genetics.115.178608-4.pdf [file 10.1534_115.178608_genetics.115.178608-4.pdf]

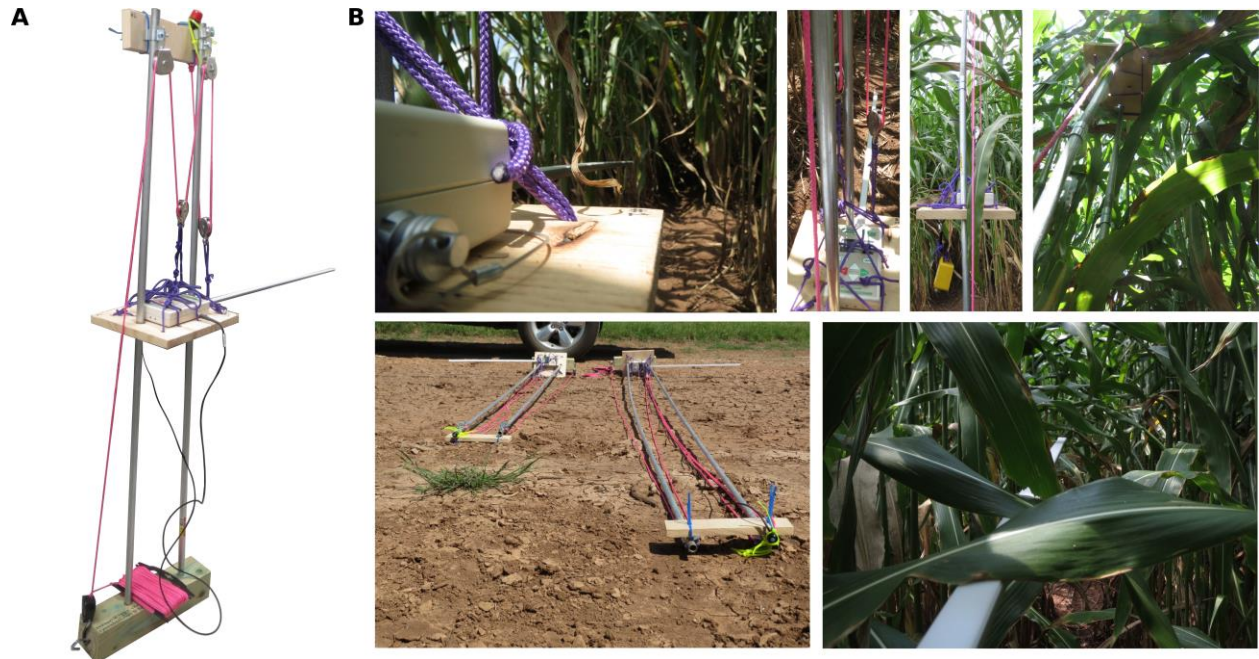

**Figure S2 Lift for LP-80 PAR meter. (A)** Image of the PAR meter lift used for collection of light measurements within canopies. **(B)** Images of the lift and PAR meter in preparation and in the sorghum canopy. There are views of the wooden platform that the LP-80 sits on and the PAR meter that takes measurements in the canopy. There is also an image of both lifts, where the one on the left has its metal poles extended to 10 ft and the one the right has poles extended to 15 ft.
