# Supplementary material
Source: PubMed Central journal article supplement (PMC4649647)
Supplement: 10.1534_115.178608_genetics.115.178608-5.pdf [file 10.1534_115.178608_genetics.115.178608-5.pdf]

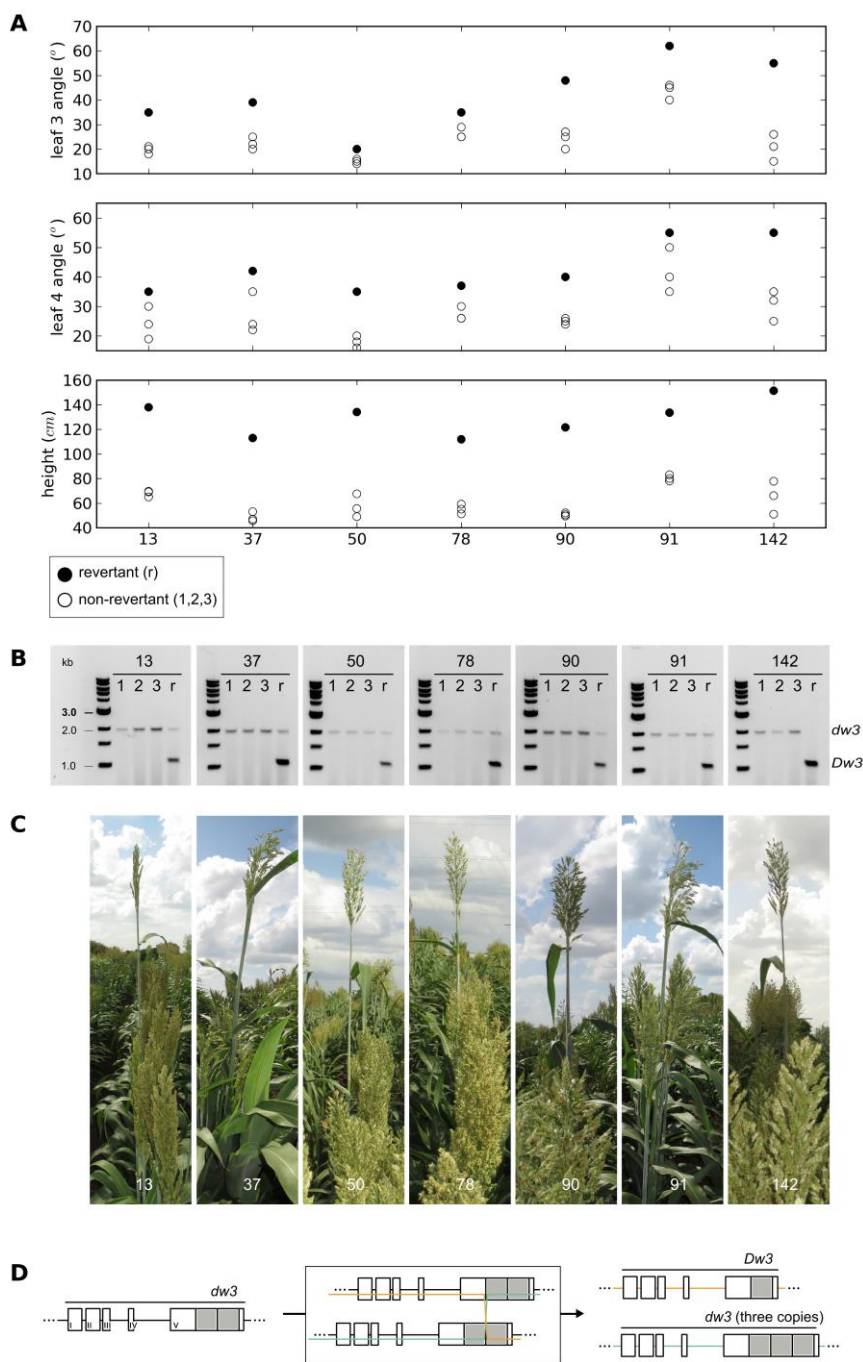

**Figure S1** *dw3* regulates leaf inclination angle. **(A)** Phenotypes of *Dw3* revertants (r; filled circles) and non-revertants (1, 2, 3; open circles) of RILs of BTx623 × IS3620C **(B)** Genotypes of revertants and non-revertants of RILs at the *dw3* locus generated using primers designed by FARFAN *et al.* (2012) that flank the 882 bp tandem repeat that makes *dw3* non-functional. Unequal crossing over at *dw3* causes reversion. **(C)** Tall revertants in the row with short non-revertants were identified and genotyped **(A and B)** in the fields in College Station, TX. **(D)** This diagram shows the *dw3* non-functional allele with tandem repeats on exon V as two gray boxes. Unequal crossing over during meiosis results in a revertant functional *Dw3* and a non-functional *dw3* with three copies of the 882 bp sequence.
