# Supplementary material
Source: PubMed Central journal article supplement (PMC4649647)
Supplement: 10.1534_115.178608_genetics.115.178608-6.pdf [file 10.1534_115.178608_genetics.115.178608-6.pdf]

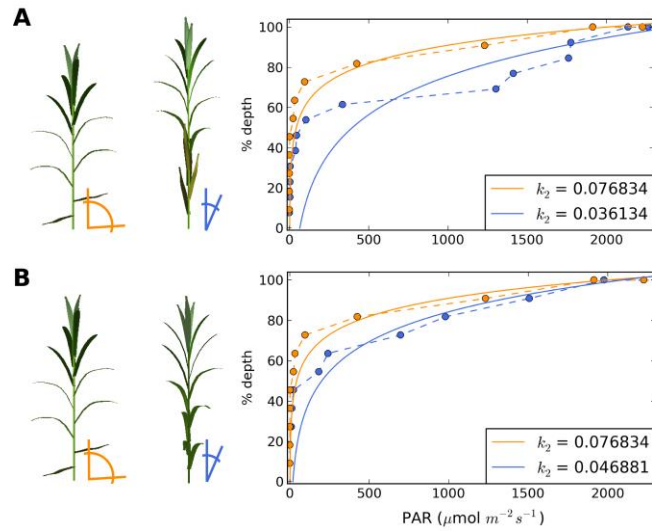

**Figure S5 Leaf inclination angle regulates light distribution in canopies. (A)** Images of RIL 63 and RIL 73 bioenergy sorghum plants (same as in Figure 2 of the main text). **(B)** Reducing the height of RIL 63 to be the same height as RIL 73 was done by decreasing the number of phytomers. The resulting  $k$  of RIL 63 remains smaller than RIL 73 in solar conditions representative of College Station, TX on July 22, 2014 at 15:30. While the qualitative relationship between  $k$  values of these plants remains unchanged with respect to height, the change in  $k$  that occurs when shortening a plant with RIL 63 angles indicates that height also plays a role in light distribution.
