# Supplementary material
Source: PubMed Central journal article supplement (PMC4649647)
Supplement: 10.1534_115.178608_genetics.115.178608-7.pdf [file 10.1534_115.178608_genetics.115.178608-7.pdf]

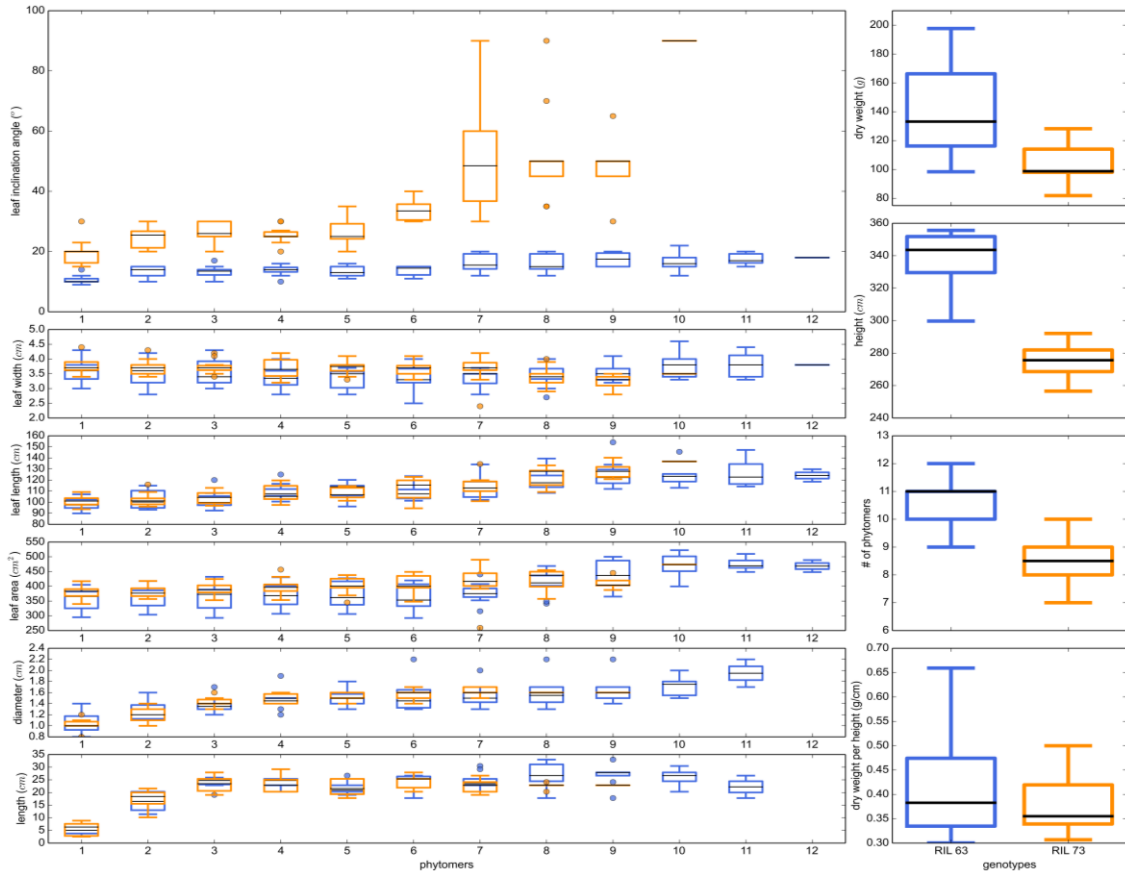

**Figure S4 R07018 x R07020 RIL 63 & RIL 73 phenotypes.** The boxplots show phenotype data from ten sorghum plants of RIL 63 (blue) and RIL 73 (orange) that were grown in 4-row plots in College Station, TX fields. On the left are measurements by phytomer, where phytomer 1 is at the top of the plant and corresponds to the phytomer with the most recent fully expanded leaf. On the right are measurements of the two genotypes. Leaf chlorophyll (SPAD) was also characterized: RIL 63 with  $41.3 \pm 1.5 \text{ nmol/cm}^2$  and RIL 73 with  $44.7 \pm 4.0 \text{ nmol/cm}^2$ .
